# Supplementary material for: Protective Effect of Irsogladine against Aspirin-Induced Mucosal Injury in Human Induced Pluripotent Stem Cell-Derived Small Intestine
Source: MDPI journal article supplement (doi:10.3390/medicina59010092), 2022-12-31
Supplement: s1 [file s1]

# Figure S2.

A

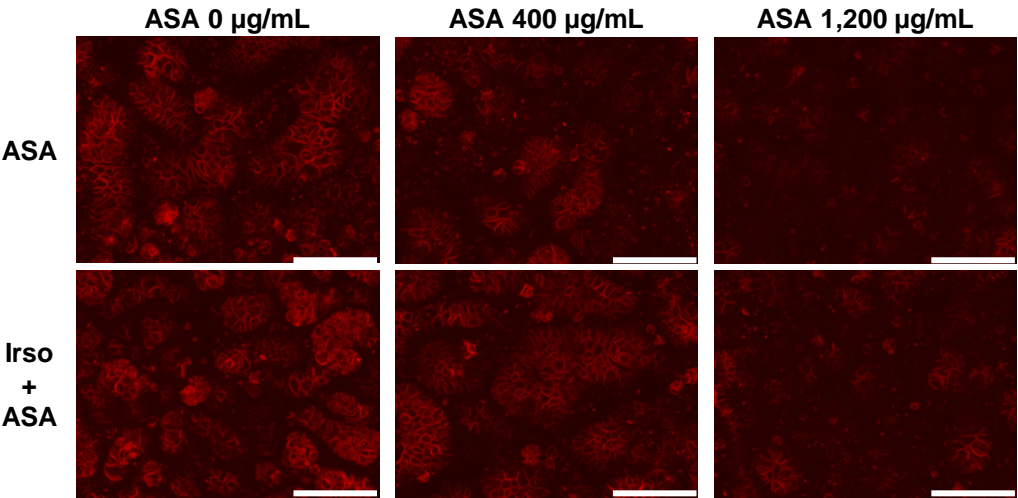

B

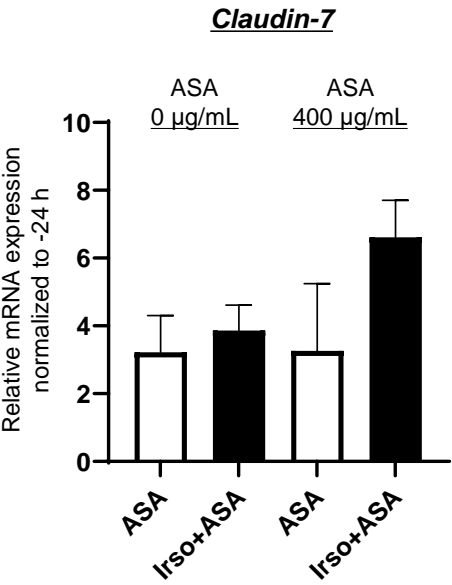

**Figure S2. Claudin-7 expression in ASA-injured 2D-hiPSC-SI after Irsogladiene administration.**  
(A) Immunofluorescence staining for Claudin-7 (red). Upper panels, ASA group; lower panels, Irso + ASA group. Scale bars, 100  $\mu\text{m}$ . (B) Irsogladiene tended to increase Claudin-7 mRNA expression in the presence of 400  $\mu\text{g/mL}$  ASA, but the difference was not statistically significant; mean  $\pm$  SD; n = 3.
