# Supplementary material for: Protective Effect of Irsogladine against Aspirin-Induced Mucosal Injury in Human Induced Pluripotent Stem Cell-Derived Small Intestine
Source: MDPI journal article supplement (doi:10.3390/medicina59010092), 2022-12-31
Supplement: s1 [file s1]

| Gene name    | Sense (5'→3')          | Antisense (5'→3')      |
|--------------|------------------------|------------------------|
| <i>Chga</i>  | TCCGACACACTTTCCAAGCC   | TTCTGCTGATGTGCCCTCTC   |
| <i>Cdh1</i>  | ATGAGTGTCCCCCGGTATCT   | GGTCAGTATCAGCCGCTTTC   |
| <i>Hprt</i>  | CTTTGCTTTCCTTGGTGAGG   | TCAAGGGCATATCCTACAACA  |
| <i>Mki67</i> | GACTTTGGGTGCGACTTGAC   | ACCCCGCTCCTTTTGATAGT   |
| <i>Lgr5</i>  | TGCTCTTCACCAACTGCATC   | CTCAGGCTCACCAGATCCTC   |
| <i>Lyz</i>   | TCAATAGCCGCTACTGGTGT   | AATGCCTTGTGGATCACGGA   |
| <i>Muc2</i>  | AGAAGGCACCGTATATGACGAC | CAGCGTTACAGACACACTGCTC |
| <i>Vil1</i>  | AGCCAGATCACTGCTGAGGT   | TGGACAGGTGTTCTCCTTC    |
