# Supplementary material for: Protective Effect of Irsogladine against Aspirin-Induced Mucosal Injury in Human Induced Pluripotent Stem Cell-Derived Small Intestine
Source: MDPI journal article supplement (doi:10.3390/medicina59010092), 2022-12-31
Supplement: s1 [file s1]

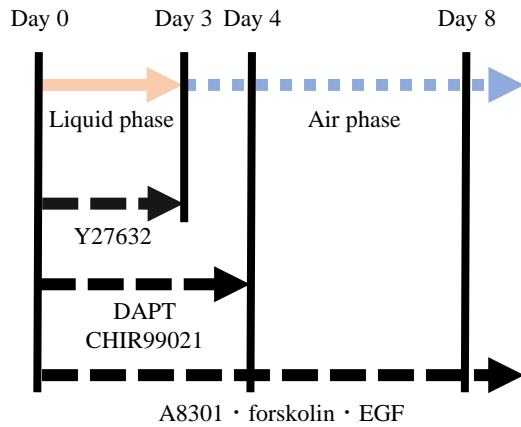

**Figure S1. Culture protocol for human iPSC-derived 2D monolayer crypt-villus structural small intestine (2D-hiPSC-SI).**

Cells were seeded from human iPSC-derived small intestinal budding organoids and cultured at the air-liquid interface. In the first 3 days, 10  $\mu$ M Y-27632, 2.5  $\mu$ M DAPT, 3  $\mu$ M CHIR99021, 500 nM A8301, 10  $\mu$ M forskolin, and 100 ng/mL EGF were added to conditioned medium. On day 3, the medium was changed to conditioned medium supplemented with 2.5  $\mu$ M DAPT, 3  $\mu$ M CHIR99021, 500 nM A8301, 10  $\mu$ M forskolin, and 100 ng/mL EGF. On day 4, the medium was changed to conditioned medium supplemented with 500 nM A8301, 10  $\mu$ M forskolin, and 100 ng/mL EGF.
